# Supplementary material for: B Chromosomes in Psalidodon scabripinnis (Characiformes, Characidae) Species Complex
Source: MDPI journal article supplement (doi:10.3390/ani12172174), 2022-08-24
Supplement: s1 [file s1]

**Table S1.** Summary of B chromosome studies in *P. scabripinnis* species complex.

| Species                                    | Methodology    | Population                                                 | Reference                            | Year |
|--------------------------------------------|----------------|------------------------------------------------------------|--------------------------------------|------|
| <i>P. scabripinnis</i> , <i>P. paranae</i> | C, GE, MG, NGS | Cascatinha River                                           | Silva et al. [21]                    | 2021 |
| <i>P. scabripinnis</i>                     | C, MC, Ep      | Lavrinha stream                                            | Barbosa et al. [76]                  | 2021 |
| <i>P. scabripinnis</i>                     | C, MC, ND      | Lavrinha stream                                            | Schemczssen-Graeff et al. [54]       | 2020 |
| <i>P. scabripinnis</i>                     | C, MC, GE, RC  | Lavrinha stream                                            | Castro et al. [73]                   | 2019 |
| <i>P. scabripinnis</i>                     | MG             | Lavrinha stream                                            | Limeira et al. [90]                  | 2019 |
| <i>P. scabripinnis</i>                     | MC, GE         | Lavrinha stream                                            | Castro et al. [72]                   | 2019 |
| <i>P. scabripinnis</i>                     | C, MC, SR      | Lavrinha stream                                            | Cornelio et al. [78]                 | 2017 |
| <i>P. scabripinnis</i>                     | C, MC          | Lavrinha stream, Lake of Pedalinho, Perdizes stream        | Barbosa et al. [66]                  | 2017 |
| <i>P. scabripinnis</i>                     | C              | São Francisco River                                        | Klassmann and Martins-Santos [88]    | 2017 |
| <i>P. scabripinnis</i>                     | C, MC          | Lavrinha stream, Ribeirao Grande stream, Tatupeba stream   | Barbosa et al. [77]                  | 2015 |
| <i>P. scabripinnis</i>                     | C, MC, MO      | Ribeirão Grande stream                                     | Castro et al. [79]                   | 2014 |
| <i>P. scabripinnis</i>                     | C, MC, M       | Pedra's stream                                             | Vicari et al. [62]                   | 2011 |
| <i>P. scabripinnis</i>                     | C              | Tatupeba stream                                            | Fernandes and Martins-Santos [89]    | 2005 |
| <i>P. scabripinnis</i>                     | Review         | Review                                                     | Moreira-Filho et al. [34]            | 2004 |
| <i>P. scabripinnis</i>                     | C, MC          | Lavrinha stream, Capivari stream, Carpas lake, Fojo stream | Ferro et al. [45]                    | 2003 |
| <i>P. scabripinnis</i>                     | C              | São Domingos stream                                        | Alves and Martins-Santos [103]       | 2002 |
| <i>P. scabripinnis</i>                     | C              | Jataí stream                                               | Araújo and Morelli [104]             | 2000 |
| <i>P. scabripinnis</i>                     | C, MC, M       | Pedra's stream                                             | Mestriner et al. [40]                | 2000 |
| <i>P. scabripinnis</i>                     | C, GV          | Ribeirão Grande stream                                     | Néo et al. [44]                      | 2000 |
| <i>P. scabripinnis</i>                     | C, GV          | Ribeirão Grande stream                                     | Néo et al. [51]                      | 2000 |
| <i>P. scabripinnis</i>                     | C              | Yukatan stream                                             | Mizoguchi and Martins-Santos [105]   | 1997 |
| <i>P. scabripinnis</i>                     | C              | Piracuama stream                                           | Souza and Moreira-Filho [106]        | 1995 |
| <i>P. scabripinnis</i>                     | C              | Córrego das Pedras                                         | Fauaz et al. [107]                   | 1994 |
| <i>P. scabripinnis</i>                     | C, SR          | Jucu River                                                 | Rocon-Stange and Almeida Toledo [46] | 1993 |
| <i>P. scabripinnis</i>                     | C              | Córrego das Pedras                                         | Salvador and Moreira-Filho [38]      | 1992 |
| <i>P. paranae</i>                          | T, D           | Cascatinha River                                           | Goes et al. [50]                     | 2021 |
| <i>P. paranae</i>                          | MC, MG         | Cascatinha River                                           | Goes et al. [108]                    | 2021 |
| <i>P. paranae</i>                          | MC, M, GE      | Cascatinha River                                           | Silva et al. [67]                    | 2021 |

|                   |           |                  |                           |      |
|-------------------|-----------|------------------|---------------------------|------|
| <i>P. paranae</i> | MC        | Capivara River   | Silva et al. [43]         | 2017 |
| <i>P. paranae</i> | C, MC, MG | Capivara River   | Silva et al. [63]         | 2016 |
| <i>P. paranae</i> | C, MC, MG | Capivara River   | Silva et al. [8]          | 2014 |
| <i>P. paranae</i> | C, MC     | Tagaçaba stream  | Abelini et al. [109]      | 2014 |
| <i>P. paranae</i> | C         | Cascatinha River | Santos et al., [53]       | 2012 |
| <i>P. paranae</i> | C         | Cascatinha River | Maistro et al. [42]       | 2000 |
| <i>P. paranae</i> | C         | Cascatinha River | Maistro et al. [41]       | 1999 |
| <i>P. paranae</i> | C, GV     | Cascatinha River | Porto-Foresti et al. [49] | 1997 |
| <i>P. paranae</i> | C         | Cascatinha River | Maistro et al. [48]       | 1994 |
| <i>P. paranae</i> | C         | Araquá River     | Maistro et al. [110]      | 1994 |
| <i>P. paranae</i> | C         | Araquá River     | Maistro et al. [111]      | 1992 |

C = cytogenetics, GE = gene expression, MG = molecular genetics, NGS = next generation sequencing, MC = molecular cytogenetics, Ep = epigenetics, ND = nuclear dynamic, RC = reproductive cycle, SR = sex-ratio, MO = morphometry, M = meiosis, GV = geographic variation, T = transmission, D = dynamics.

**Table S2.** Diversity of B chromosomes in *Psalidodon* genus.

| Species                  | Population              | River Basin        | County             | 2n    | Bs  | Size   | Shape | Reference                        |
|--------------------------|-------------------------|--------------------|--------------------|-------|-----|--------|-------|----------------------------------|
| <i>P. bockmanni</i>      | Água da Madalena stream | Paranapanema River | Botucatu, BRA      | 50    | 0-1 | large  | m     | Silva et al. [63]                |
| <i>P. bockmanni</i>      | Alambari River          | Paranapanema River | Bauru, BRA         | 50    | 0-1 | micro  | a     | Hashimoto et al. [112]           |
| <i>P. bockmanni</i>      | Alambari River          | Paranapanema River | Bauru, BRA         | 50    | 0-1 | large  | m     | Daniel et al. [113]              |
| <i>P. correntinus</i>    | Iguaçu River            | Paraná River       | Foz do Iguaçu, BRA | 36    | 0-1 | large  | sm    | Ahmad et al. [114]               |
| <i>P. eigenmanniorum</i> | Caetano Stream          | Paraíba River      | Uberlândia, BRA    | 48    | 0-2 | large  | m     | Torres-Mariano and Morelli [115] |
| <i>P. fasciatus</i>      | Água da Madalena stream | Paranapanema River | Botucatu, BRA      | 45-48 | 0-1 | large  | m     | Silva et al. [63]                |
| <i>P. fasciatus</i>      | Água da Madalena stream | Paranapanema River | Botucatu, BRA      | 45-48 | 0-1 | medium | sm    | Silva et al. [63]                |
| <i>P. fasciatus</i>      | Alambari River          | Paranapanema River | Bauru, BRA         | 46    | 0-1 | medium | a     | Hashimoto et al. [112]           |
| <i>P. fasciatus</i>      | Araras stream           | Paranapanema River | Araras, BRA        | 48    | 0-1 | large  | m     | Silva et al. [63]                |
| <i>P. paranae</i>        | Araquá River            | Tietê River        | Botucatu, BRA      | 50    | 0-1 | large  | m     | Maistro et al. [110]             |
| <i>P. paranae</i>        | Araquá River            | Tietê River        | Botucatu, BRA      | 50    | 0-1 | large  | m     | Maistro et al. [111]             |
| <i>P. paranae</i>        | Capivara River          | Tietê River        | Botucatu, BRA      | 50    | 0-1 | macro  | m/sm  | Silva et al. [8]                 |

|                        |                                      |                      |                       |    |     |        |      |                                      |
|------------------------|--------------------------------------|----------------------|-----------------------|----|-----|--------|------|--------------------------------------|
| <i>P. paranae</i>      | Cascatinha River                     | Tietê River          | Botucatu, BRA         | 50 | 0-2 | large  | m    | Maistro et al. [48]                  |
| <i>P. paranae</i>      | Cascatinha River                     | Tietê River          | Botucatu, BRA         | 50 | 0-1 | medium | a    | Santos et al. [53]                   |
| <i>P. paranae</i>      | Tagaçaba Stream                      | Ivaí River           | Maringá, BRA          | 50 | 0-1 | large  | m    | Abelini et al. [109]                 |
| <i>P. scabripinnis</i> | Lavrinha stream                      | Paraíba do Sul River | Campos do Jordão, BRA | 50 | 0-1 | large  | m/sm | Ferro et al. [45]                    |
| <i>P. scabripinnis</i> | Capivari stream                      | Sapucaí-Guaçu River  | Campos do Jordão, BRA | 50 | 0-1 | large  | m    | Ferro et al. [45]                    |
| <i>P. scabripinnis</i> | Carpas lake                          | Sapucaí-Guaçu River  | Campos do Jordão, BRA | 50 | 0-1 | large  | m/sm | Ferro et al. [45]                    |
| <i>P. scabripinnis</i> | Fojo stream                          | Sapucaí-Guaçu River  | Campos do Jordão, BRA | 50 | 0-1 | large  | m/sm | Ferro et al. [45]                    |
| <i>P. scabripinnis</i> | Fojo stream                          | Sapucaí-Guaçu River  | Campos do Jordão, BRA | 50 | 0-2 | medium | m    | Ferro et al. [45]                    |
| <i>P. scabripinnis</i> | Ribeirão Grande stream               | Paraíba do Sul River | Campos do Jordão, BRA | 50 | 0-2 | large  | m/sm | Néo et al. [44]                      |
| <i>P. scabripinnis</i> | Ribeirão Grande stream               | Paraíba do Sul River | Campos do Jordão, BRA | 50 | 0-1 | medium | m    | Néo et al. [44]                      |
| <i>P. scabripinnis</i> | Jataí stream                         | Paranaíba River      | Uberlândia, BRA       | 50 | 0-1 | small  | a    | Araújo and Morelli [104]             |
| <i>P. scabripinnis</i> | Jucu River                           | Jucu River           | Vitor Hugo, BRA       | 50 | 0-4 | micro  | a    | Rocon-Stange and Almeida Toledo [46] |
| <i>P. scabripinnis</i> | Pedra's stream                       | Sapucaí river        | Campos do Jordão, BRA | 50 | 0-2 | large  | m    | Salvador and Moreira-Filho [38]      |
| <i>P. scabripinnis</i> | Piracuama stream                     | Paraíba do Sul River | Pindamonhangaba       | 50 | 0-1 | large  | m    | Souza and Moreira-Filho [106]        |
| <i>P. scabripinnis</i> | São Domingos stream                  | Ivaí River           | Maringá, BRA          | 48 | 0-1 | small  | m    | Alves and Martins-Santos [103]       |
| <i>P. scabripinnis</i> | Tatupeba stream                      | Ivaí River           | Marialva, BRA         | 50 | 0-1 | large  | m    | Fernandes and Martins-Santos [64]    |
| <i>P. scabripinnis</i> | Tatupeba stream                      | Ivaí River           | Marialva, BRA         | 46 | 0-1 | small  | a    | Fernandes and Martins-Santos [64]    |
| <i>P. scabripinnis</i> | Tatupeba stream                      | Ivaí River           | Marialva, BRA         | 48 | 0-1 | medium | st/a | Fernandes and Martins-Santos [64]    |
| <i>P. scabripinnis</i> | Yukatan stream                       | Ivaí River           | Marialva, BRA         | 50 | 0-1 | large  | m    | Mizoguchi and Martins-Santos [105]   |
| <i>P. schubarti</i>    | Paraná River                         | Paraná River         | Misiones, ARG         | 36 | 0-1 | large  | m    | Moreira-Filho et al. [116]           |
| <i>P. sp. B</i>        | Salto Caxias reservoir, Iguazu River | Paraná River         | Foz do Iguazu, BRA    | 50 | 1-2 | large  | m    | Fazoli et al. [117]                  |
| <i>P. sp. B</i>        | Salto Caxias reservoir, Iguazu River | Paraná River         | Foz do Iguazu, BRA    | 50 | 1-2 | small  | sm   | Fazoli et al. [117]                  |
| <i>P. sp. B</i>        | Salto Caxias reservoir, Iguazu River | Paraná River         | Foz do Iguazu, BRA    | 50 | 1-2 | micro  | a    | Fazoli et al. [117]                  |

2n = diploid chromosome number. Bs = number of B chromosomes. a = acrocentric. m = metacentric. sm = submetacentric. st = subtelocentric.
